# Supplementary material for: Enhanced baseflow separation in rural catchments: event-specific calibration of recursive digital filters with tracer-derived data
Source: Copernicus journal article supplement (doi:10.5194/hess-29-6959-2025), 2025-12-03
Supplement: Supplementary file 1 [file hess-29-6959-2025-supplement.pdf]

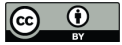

*Supplement of*

## **Enhanced baseflow separation in rural catchments: event-specific calibration of recursive digital filters with tracer-derived data**

**Fernanda Helfer et al.**

*Correspondence to:* Fernanda Helfer (f.helfer@griffith.edu.au)

The copyright of individual parts of the supplement might differ from the article licence.

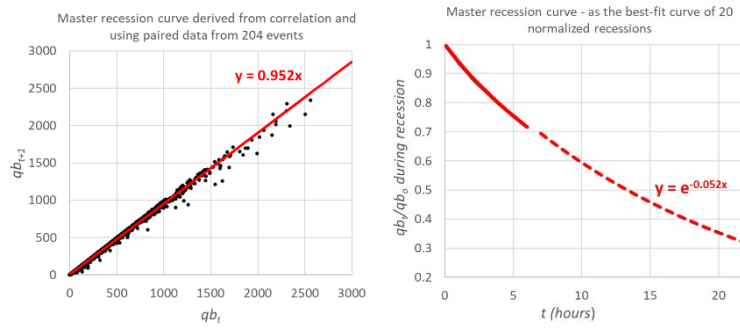

Figure S1. Master recession curve analysis for the Arvorezinha catchment derived from (left) correlation analysis of 204 recession events showing recession constant  $a = 0.952$ , and (right) best-fit exponential curve through 20 normalized recession hydrographs, with  $k = -0.052$  ( $a = 0.949$ ). The close agreement between methods validates the representativeness of the recession constant used in the baseflow separation filters.
